# Supplementary material for: Longitudinal Changes in Temporospatial Gait Characteristics during the First Year Post-Stroke
Source: MDPI journal article supplement (doi:10.3390/brainsci11121648), 2021-12-15
Supplement: s1 [file s1]

## SUPPLEMENT MATERIALS

For

Longitudinal Changes in Temporospacial Gait Characteristics During the First Year Post-Stroke

Table S1. Mean (SD) Fugl-Meyer Lower Extremity (FM-LE) Motor scores for the paretic leg and temporospatial gait parameters at the initial evaluation (T0) and at approximately 6 (T1) and 12 months (T2) post-stroke ( $p$ -values refer to paired  $t$ -tests).

|                                   | N=46         |              |                             |                  | N=24         |              |                 |                  |
|-----------------------------------|--------------|--------------|-----------------------------|------------------|--------------|--------------|-----------------|------------------|
|                                   | T0           | T1           | $p$ -value                  | Cohen's $d^{\#}$ | T1           | T2           | $p$ -value      | Cohen's $d^{\#}$ |
| FM-LE Motor score                 | 24.0 (5.9)   | 28.5 (5.4)   | <b>&lt;0.0001</b><br>[n=39] | -1.13            | 29.0 (5.3)   | 28.0 (4.9)   | 0.151<br>[n=22] | 0.32             |
| <b>Stride Parameter</b>           |              |              |                             |                  |              |              |                 |                  |
| Gait speed (cm/s)                 | 56.2 (36.5)  | 88.9 (34.2)  | <b>&lt;0.0001</b>           | -1.11            | 92.4 (34.2)  | 99.7 (30.9)  | 0.050           | -0.42            |
| Stride Length (cm)                | 85.4 (27.9)  | 108.3 (25.7) | <b>&lt;0.0001</b>           | -0.96            | 112.0 (26.9) | 117.7 (24.4) | 0.086           | -0.37            |
| Cadence (steps/min)               | 71.3 (28.5)  | 95.0 (21.2)  | <b>0.0001</b>               | -1.14            | 96.3 (19.0)  | 100.0 (17.3) | 0.053           | -0.42            |
| Step width (cm)                   | 13.6 (3.6)   | 13.8 (4.6)   | 0.652                       | -0.07            | 13.5 (4.0)   | 13.0 (3.3)   | 0.260           | 0.24             |
| <b>Paretic Step Parameter</b>     |              |              |                             |                  |              |              |                 |                  |
| Stance time (%GC)                 | 71.0 (7.9)   | 66.0 (4.3)   | <b>0.0001</b>               | 0.64             | 65.6 (3.5)   | 65.0 (3.4)   | 0.226           | 0.25             |
| Early double support time (%GC)   | 19.8 (6.7)   | 16.4 (3.4)   | <b>0.0003</b>               | 0.58             | 16.3 (3.5)   | 15.9 (2.8)   | 0.484           | 0.15             |
| Single support time (%GC)         | 25.2 (9.3)   | 31.6 (5.9)   | <b>&lt;0.0001</b>           | -0.86            | 32.6 (4.7)   | 33.2 (4.1)   | 0.399           | -0.18            |
| Step length (cm)                  | 44.5 (12.2)  | 55.2 (14.2)  | <b>&lt;0.0001</b>           | -0.70            | 55.8 (12.8)  | 58.3 (12.2)  | 0.105           | -0.35            |
| Cadence (steps/min)               | 67.8 (29.9)  | 92.6 (23.4)  | <b>&lt;0.0001</b>           | -1.21            | 94.8 (20.6)  | 98.6 (18.7)  | 0.065           | -0.40            |
| <b>Non-paretic Step Parameter</b> |              |              |                             |                  |              |              |                 |                  |
| Stance time (%GC)                 | 74.7 (9.5)   | 68.4 (5.9)   | <b>&lt;0.0001</b>           | 0.82             | 67.3 (4.7)   | 66.8 (4.1)   | 0.411           | 0.17             |
| Early double support time (%GC)   | 26.0 (13.3)  | 18.1 (6.9)   | <b>&lt;0.0001</b>           | 0.70             | 16.8 (3.7)   | 15.8 (2.9)   | 0.106           | 0.34             |
| Single support time (%GC)         | 28.9 (7.8)   | 33.9 (4.5)   | <b>0.0001</b>               | -0.64            | 34.2 (3.6)   | 35.1 (3.4)   | 0.143           | -0.31            |
| Step length (cm)                  | 40.6 (16.9)  | 52.6 (15.1)  | <b>&lt;0.0001</b>           | -0.87            | 55.7 (14.4)  | 58.9 (12.4)  | 0.077           | -0.38            |
| Cadence (steps/min)               | 78.0 (25.4)  | 98.6 (18.7)  | <b>&lt;0.0001</b>           | -1.03            | 98.6 (18.3)  | 102.1 (16.4) | 0.054           | -0.42            |
| <b>Symmetry Index (%)*</b>        |              |              |                             |                  |              |              |                 |                  |
| Stance time                       | -4.8 (7.6)   | -3.5 (6.7)   | 0.0367                      | 0.32             | -2.5 (7.1)   | -2.8 (7.7)   | 0.472           | -0.15            |
| Early double support time         | -19.6 (38.5) | -6.9 (18.7)  | <b>&lt;0.0001</b>           | 0.73             | -3.4 (12.8)  | 0.4 (10.3)   | 0.053           | 0.42             |
| Single support time               | -17.8 (27.2) | -8.4 (17.1)  | <b>0.0001</b>               | 0.64             | -5.3 (16.0)  | -5.9 (17.9)  | 0.331           | -0.20            |
| Step length                       | 14.8 (35.7)  | 5.5 (30.4)   | 0.131                       | 0.23             | 1.1 (10.4)   | -1.1 (8.8)   | 0.944           | 0.01             |
| Cadence                           | -18.6 (28.5) | -8.2 (16.9)  | <b>&lt;0.0001</b>           | 0.67             | -4.6 (13.8)  | -3.9 (13.6)  | 0.248           | 0.24             |

Significant differences in bold ( $p \leq 0.0025$ ). GC: Gait cycle.

\* Absolute values used in the  $t$ -tests.

<sup>#</sup> Effect size: small 0.2, medium 0.5, large 0.8 (Cohen, J. *Statistical Power and Analysis for the Behavior Sciences*, 2nd ed.; Lawrence Erlbaum Associates, Hillside, NJ, USA, 1988).
